# Supplementary material
Source: PubMed Central journal article supplement (PMC7043668)
Supplement: JB.00747-19-s0001.pdf [file JB.00747-19-s0001.pdf]

**Supplemental material for:** Rap-protein paralogs of *Bacillus thuringiensis*: a multifunctional and redundant regulatory repertoire for the control of collective functions.

**Gabriela Gastélum, Mayra de la Torre, Jorge Rocha**

## Supplementary Figures.

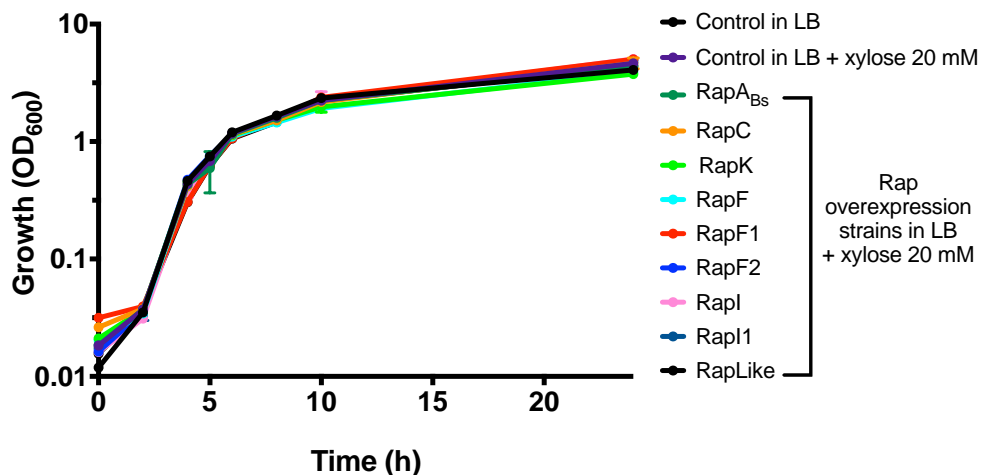

**Figure S1.** Growth curves of Rap-overexpression strains. Preinoculums of the control strain, and strains carrying plasmids for Rap overexpression, were washed and used to inoculate 30 ml of fresh media to a starting OD<sub>600</sub>  $\approx$  0.03, in triplicate 125 ml flasks. Cultures were incubated at 30 °C with shaking, following OD<sub>600</sub> for 24 h. Each data point represents average of three replicates  $\pm$  SD.

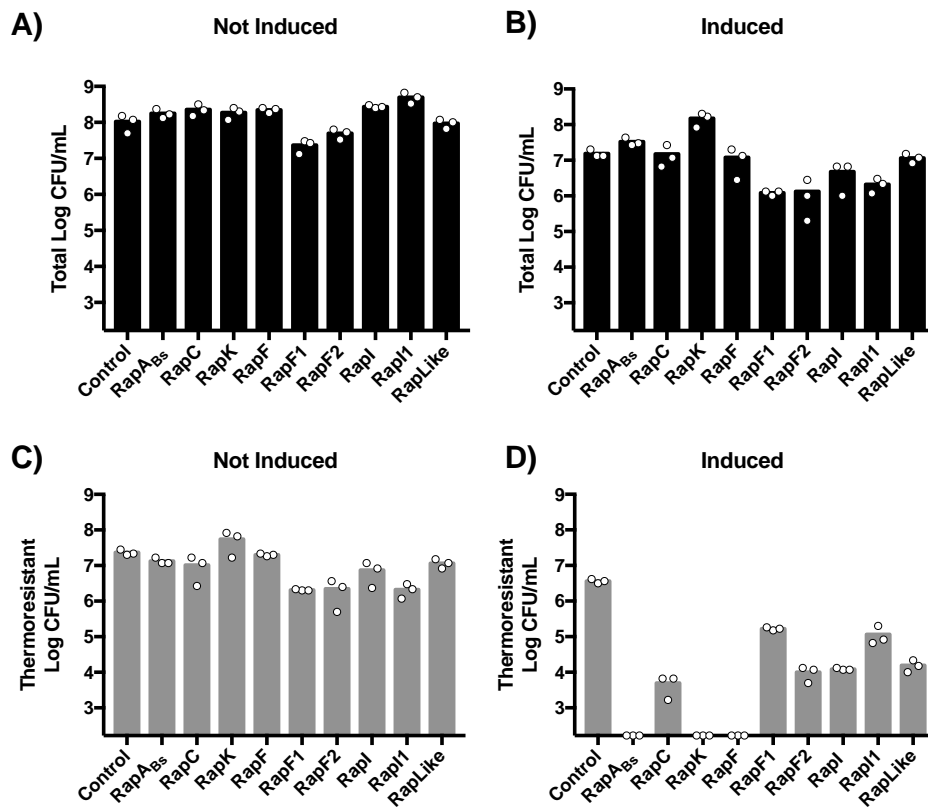

**Figure S2.** Effect of the induction of Rap overexpression in viability and sporulation of Bt8741. A-B) Total and C-D) thermoresistant CFU counts were obtained from triplicate 72 h cultures of control and Rap-overexpression strains, from LB with and without the addition of 20 mM xylose. Columns indicate average of three replicates; dots indicate individual data. Y-axis lower limit is adjusted to the limit of detection of the assay.

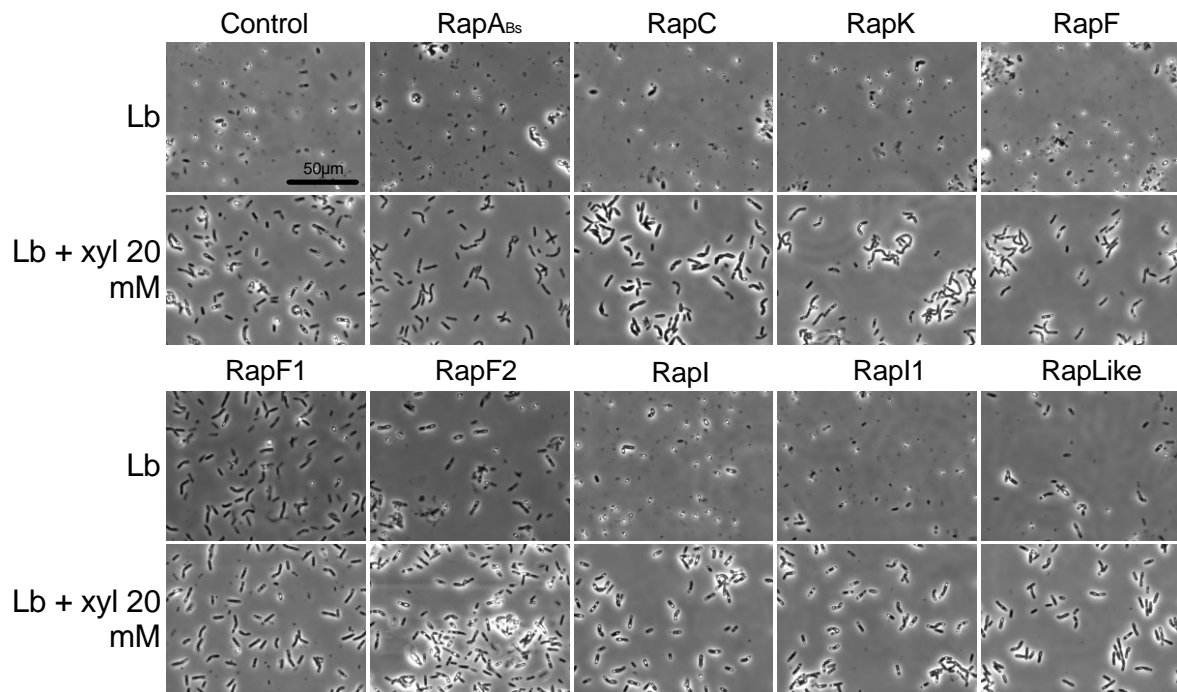

**Figure S3.** Cell morphology of control strain and Rap-overexpression strains. Samples were taken from induced cultures at 72 h. Phase contrast microscopy 63X + 1.8X magnification.

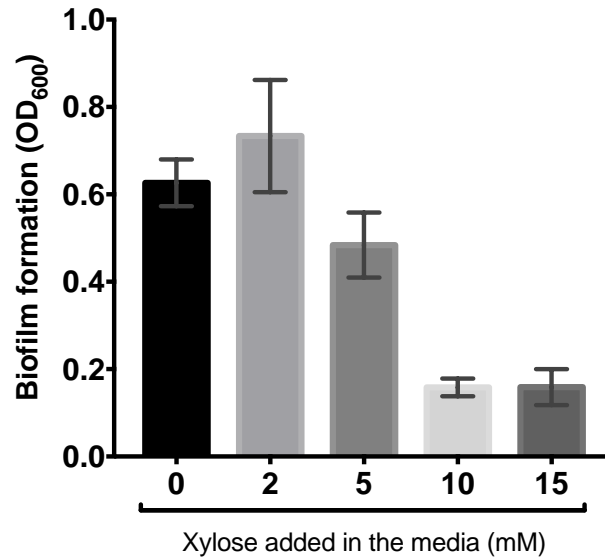

**Figure S4.** Biofilm formation of Bt8741 is inhibited by xylose addition. Three  $\mu$ l of preinoculum of the control strain, were used to inoculate 3 mL of nutrient broth with different concentrations of xylose. After 48 h, cells from the biofilm were recovered, suspended in 1.5 ml of PBS, and OD<sub>600</sub> was measured. Columns indicate average of three replicates  $\pm$  SD.

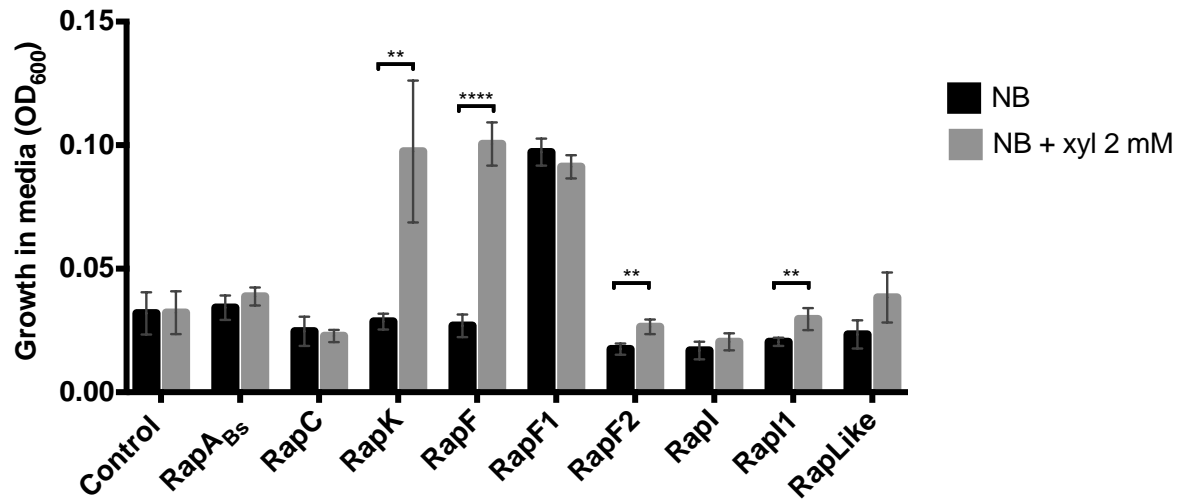

**Figure S5.** Planktonic growth of control and Rap-overexpression strains, during the assays for biofilm formation. OD<sub>600</sub> was measured from the liquid media after 48 h. Columns indicate average of five individual measurements  $\pm$  SD. NB, Nutrient Broth; \*\*,  $p < 0.005$ ; \*\*\*\*,  $p < 0.0001$ .

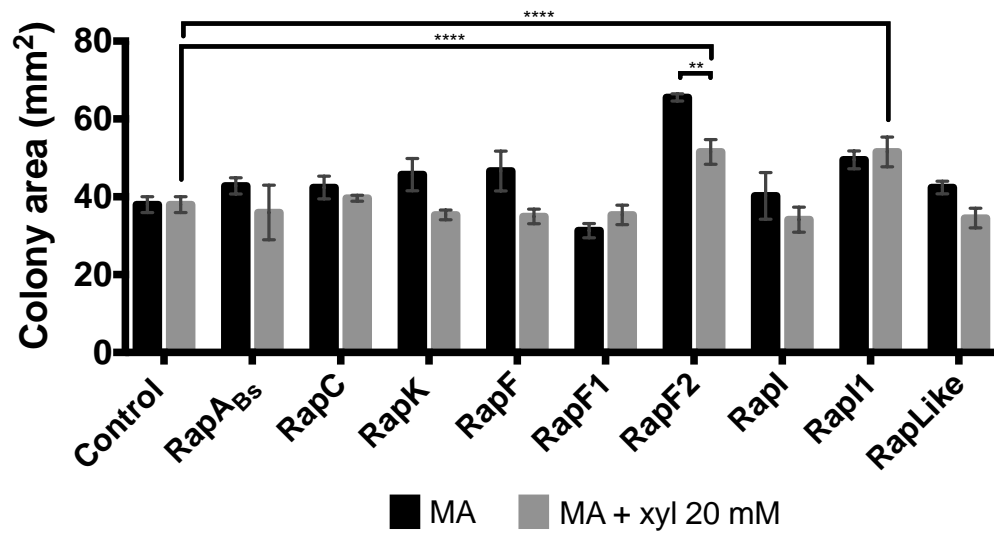

**Figure S6.** Colony area of Rap overexpression strains in milk agar after 24 h of incubation. Columns indicate average of triplicate measurements  $\pm$  SD. MA, milk agar.

\*\* ,  $p < 0.005$ ; \*\*\*\*,  $p < 0.0001$ .

**Supplementary Tables.**

**Table S1.** Strains and plasmids used in this study

| <b>Strain</b>                      | <b>Description</b>                                                  | <b>Reference</b> |
|------------------------------------|---------------------------------------------------------------------|------------------|
| <i>Bacillus thuringiensis</i> 8741 | Wild type                                                           | (1)              |
| <i>Bacillus subtilis</i> 168       | Wild type                                                           | (2)              |
| <i>Escherichia coli</i> TOP10      | Strain used for construction and cloning of overexpression plasmids | (3)              |
| <b>Plasmid</b>                     | <b>Description</b>                                                  | <b>Reference</b> |
| pHT315                             | Cloning vector for Bt $\approx$ 15 copies per cell                  | (4)              |
| pHT315- P <sub>xyIA</sub>          | Xylose inducible overexpression plasmid                             | This study       |
| pHT315- P <sub>xyIA</sub> 'rapC    | Plasmid for overexpression of RapC from Bt8741                      | This study       |
| pHT315- P <sub>xyIA</sub> 'rapK    | Plasmid for overexpression of RapK from Bt8741                      | This study       |
| pHT315- P <sub>xyIA</sub> 'rapF    | Plasmid for overexpression of RapF from Bt8741                      | This study       |
| pHT315- P <sub>xyIA</sub> 'rapF1   | Plasmid for overexpression of RapF1 from Bt8741                     | This study       |
| pHT315- P <sub>xyIA</sub> 'rapF2   | Plasmid for overexpression of RapF2 from Bt8741                     | This study       |
| pHT315- P <sub>xyIA</sub> 'rapI    | Plasmid for overexpression of RapI from Bt8741                      | This study       |
| pHT315- P <sub>xyIA</sub> 'rapI1   | Plasmid for overexpression of RapI1 from Bt8741                     | This study       |
| pHT315- P <sub>xyIA</sub> 'rapLike | Plasmid for overexpression of RapLike from Bt8741                   | This study       |
| pHT315- P <sub>xyIA</sub> 'rapA    | Plasmid for overexpression of RapA from Bs168                       | This study       |



**Table S2.** Oligonucleotides used in this study.

| <b>Name</b> | <b>Sequence (5' to 3')</b>              | <b>Description</b>           |
|-------------|-----------------------------------------|------------------------------|
| GG1         | AAGA <u>AAGCTT</u> CCATGTCACTATTGCTTCAG | Fwd <i>xylR</i>              |
| GG2         | CTGCTGCAGAGATTGAGCCATGTGATTTTC          | Rev P <sub><i>xylA</i></sub> |
| GG3         | CTGCTGCAGGACGTTCAAACAAAAAGTAATG         | Fwd <i>rapK</i>              |
| GG4         | GTCGTCGACTTCCCATTAATGTTAGGATTG          | Rev <i>rapK</i>              |
| GG5         | CTGCTGCAGCAACTAGGAAACGAACAAATTAC        | Fwd <i>rapI</i>              |
| GG6         | GTCGTCGACTTCATCATTTCATGACTCC            | Rev <i>rapI</i>              |
| GG7         | CTGCTGCAGACAGCAACCAGTAATGAGAAG          | Fwd <i>rapF</i>              |
| GG8         | GTCGTCGACGTTTTCTTCATTTTAATGCCTC         | Rev <i>rapF</i>              |
| GG9         | CTGCTGCAGAACTAAGTTTTTGACCCAAG           | Fwd <i>rapC</i>              |
| GG10        | GTCGTCGACTTTTCATCACTGTAACGCTC           | Rev <i>rapC</i>              |
| GG11        | CTGCTGCAGAGTGTACATGTAATAAAAAAGGAAG      | Fwd <i>rapF1</i>             |
| GG12        | GTCGTCGACCAATTGAACTGCTGATGATC           | Rev <i>rapF1</i>             |
| GG13        | CTGCTGCAGAACGTTCAACTACAAGGTAATG         | Fwd <i>rapF2</i>             |
| GG14        | GTCGTCGACTATCATTTTAATGCCCTTTC           | Rev <i>rapF2</i>             |
| GG15        | CTGCTGCAGGGAGCAGATGTAGTAACGC            | Fwd <i>rapI1</i>             |
| GG16        | GTCGTCGACATAGCCAAACGAAATTTCTTC          | Rev <i>rapI1</i>             |
| GG17        | CTGCTGCAGTTATTAAGGGGCATGAACAG           | Fwd <i>raplike</i>           |
| GG18        | GTCGTCGACTCATTATCTTAGTGCCTCCTTAG        | Rev <i>raplike</i>           |
| GG19        | CTGCTGCAGAGGATGAAGCAGACGATTC            | Fwd <i>rapA</i>              |
| GG20        | GTCGTCGACAACAAACCTGACATCCATTTAG         | Rev <i>rapA</i>              |
| GG26        | AACATAGTACATAGCGAATCTTC                 | Fwd P <sub><i>xylA</i></sub> |
| DS16        | CAGGCTTTACACTTTATGC                     | Fwd<br>pHT315                |
| DS17        | CGATTAAGTTGGGTAACG                      | Rev<br>pHT315                |

Underlined sequence indicates restriction site; Fwd, forward primer; Rev, reverse primer.

## References

1. Rocha J, Flores V, Cabrera R, Soto-Guzmán A, Granados G, Juaristi E, Guarneros G, De La Torre M. 2012. Evolution and some functions of the NprR-NprRB quorum-sensing system in the *Bacillus cereus* group. *Appl Microbiol Biotechnol* 94:1069–1078.
2. Perego M, Hanstein C, Welsh KM, Djavakhishvili T, Glaser P, Hoch JA. 1994. Multiple protein-aspartate phosphatases provide a mechanism for the integration of diverse signals in the control of development in *B. subtilis*. *Cell* 79:1047–1055.
3. Maniatis T, Fritsch EF, Sambrook J. 1988. *Molecular Cloning : a laboratory manual*. 2nd edition. Cold Spring Harb ,New York.
4. Arantes O, Lereclus D. 1991. Construction of Cloning Vectors for *Bacillus thuringiensis*. *Gene* 108:115–119.
